# Supplementary figures and images for: Andrographolide sensitizes cancer cells to TRAIL-induced apoptosis via p53-mediated death receptor 4 up-regulation
Source: Oxford University Press journal article supplement (doi:10.1158/1535-7163.mct-08-0071), 2008-07-01

**A**

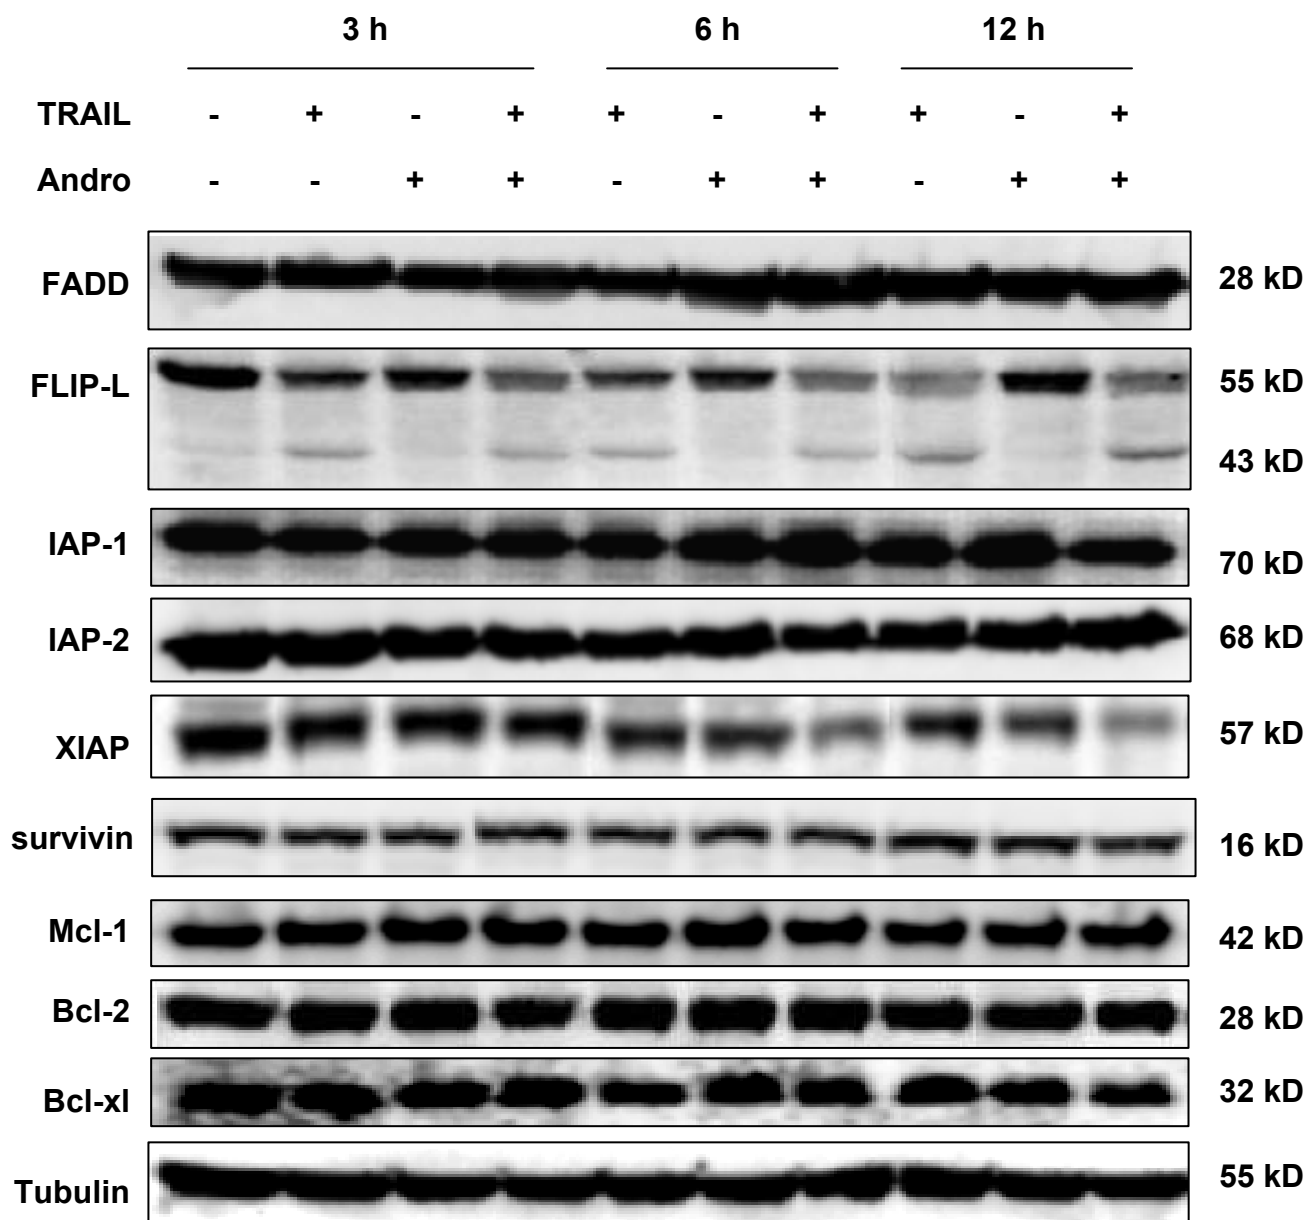

Supplementary Figure 1

**B**

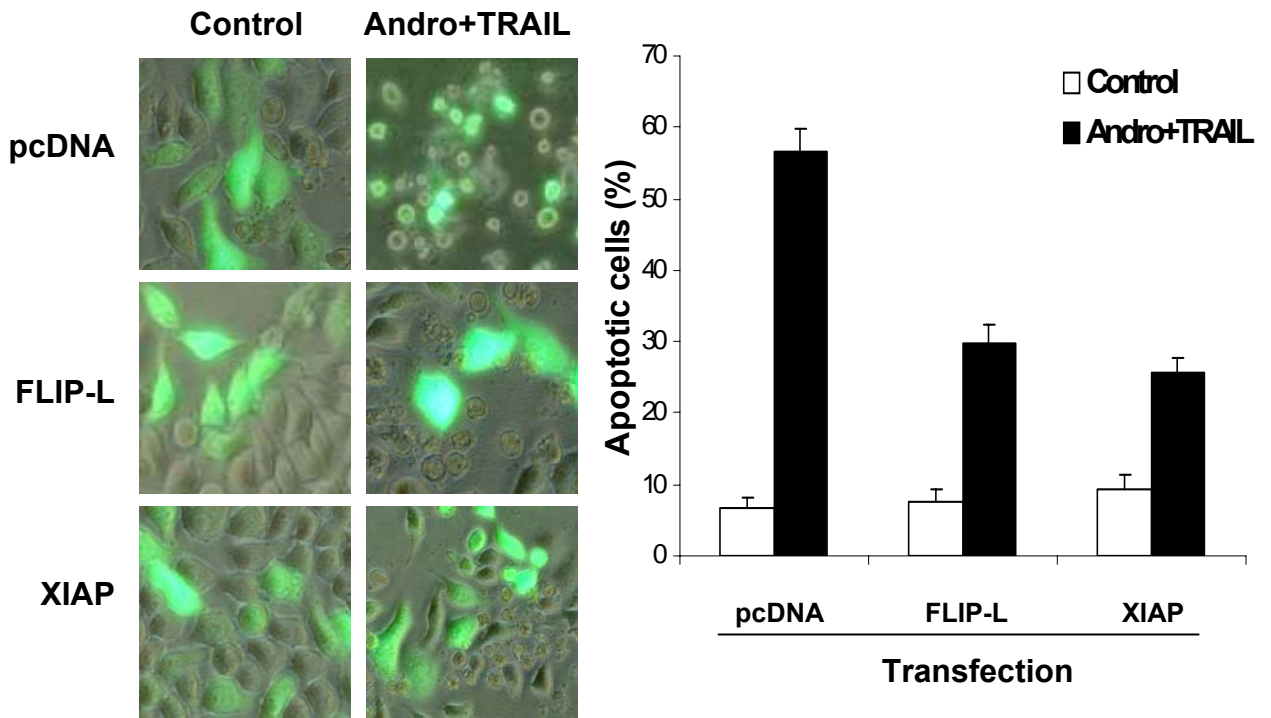

**C**

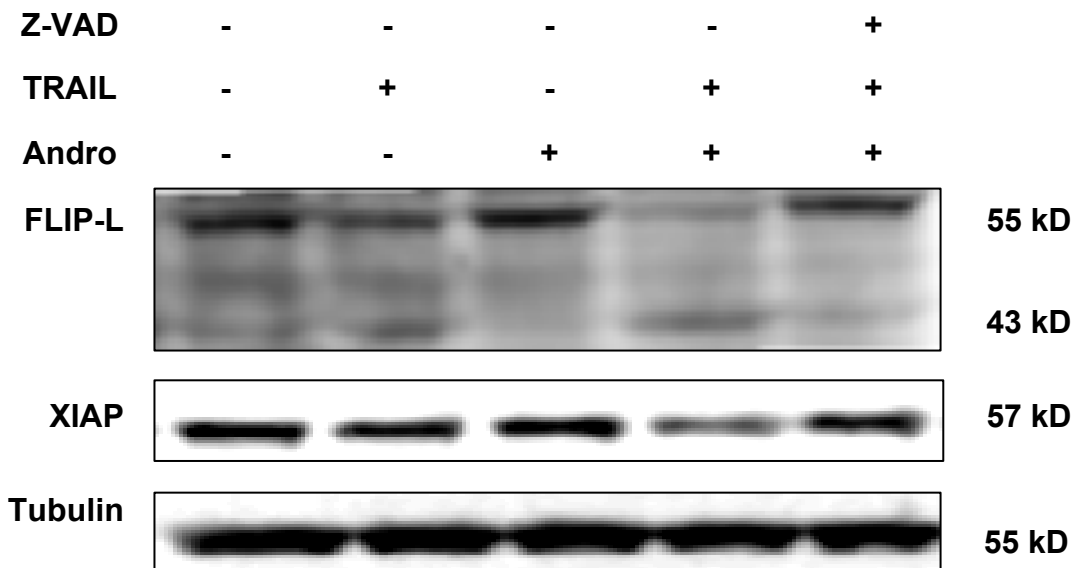

**A**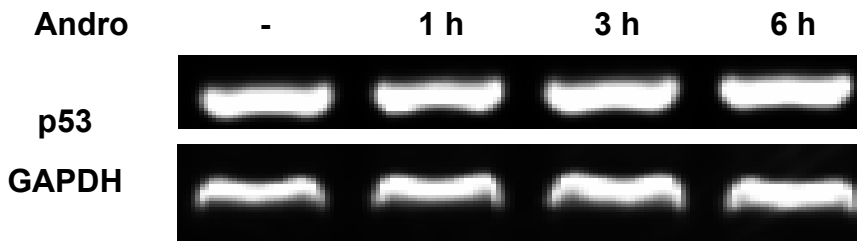**B**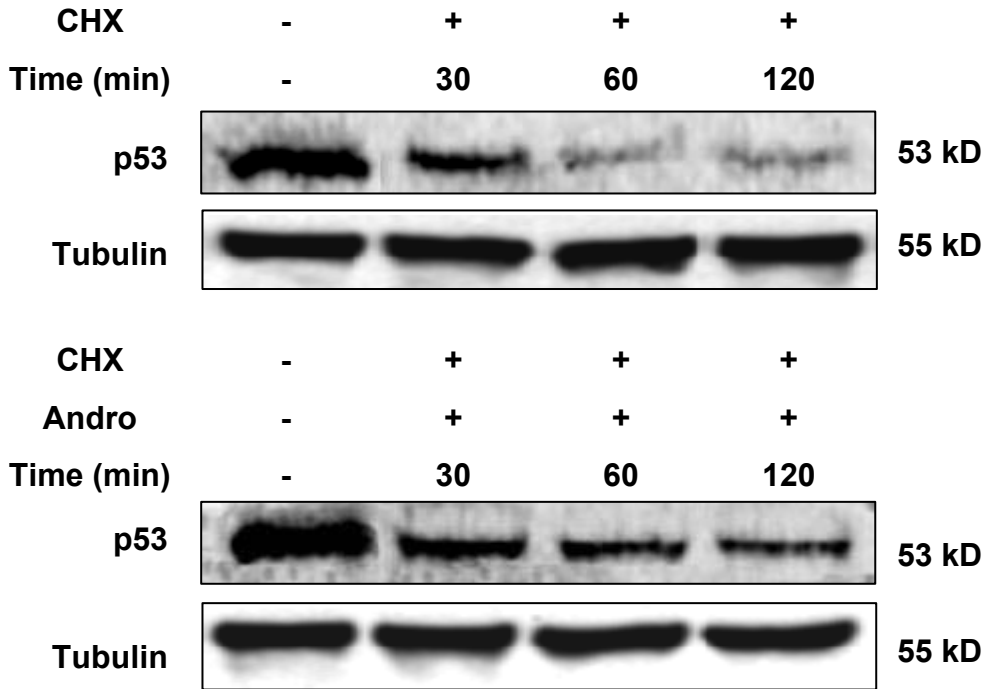**C**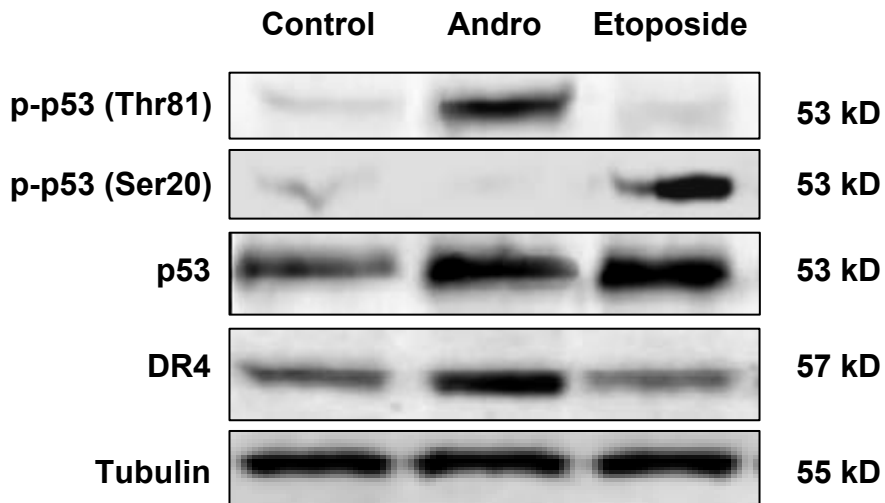

**A**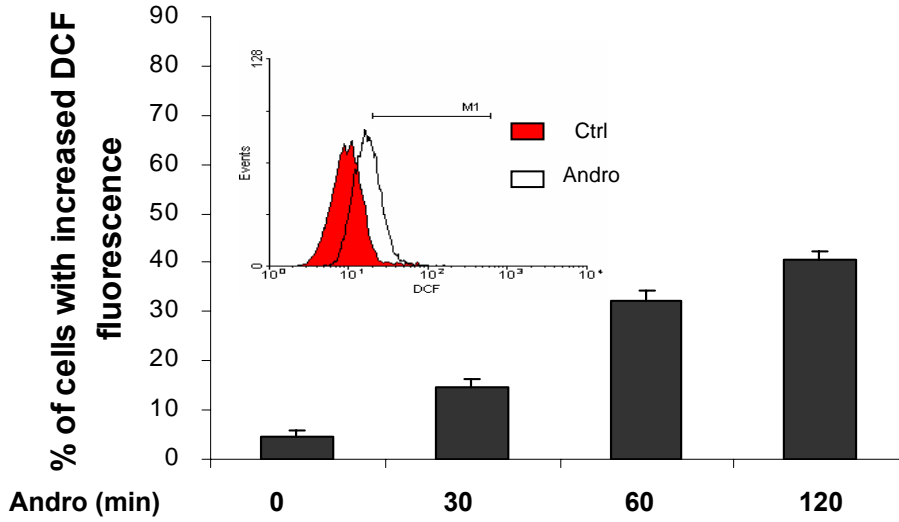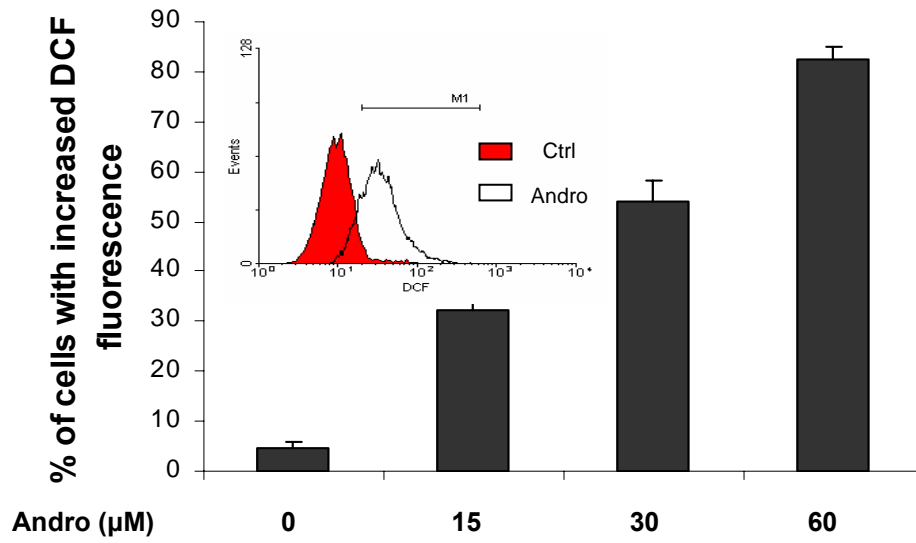**B**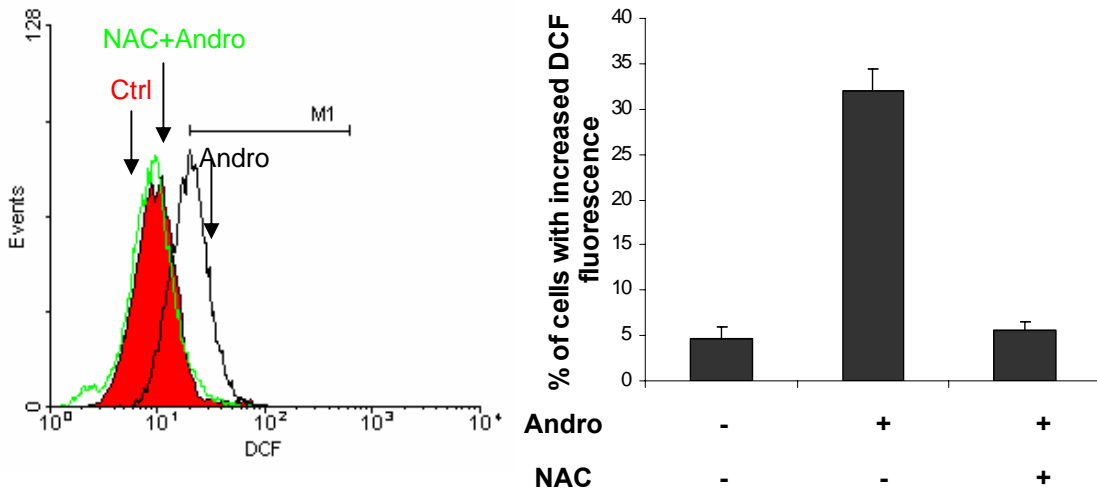

Supplementary Figure 3

Supplement: 15357163mct080071-sup-mct-08-0071--suppl_fig_1.pdf [file 15357163mct080071-sup-mct-08-0071--suppl_fig_1.pdf]
